# Supplementary material
Source: PubMed Central journal article supplement (PMC9973383)
Supplement: NIHMS1872482-supplement-supp_material.pdf [file NIHMS1872482-supplement-supp_material.pdf]

**Appendix**  
**Association of Obesity and Diabetes With the Incidence of Breast Cancer in Louisiana**  
**Hossain et al.**

**Appendix Figure 1.** Summary of case and control eligibility for the study.

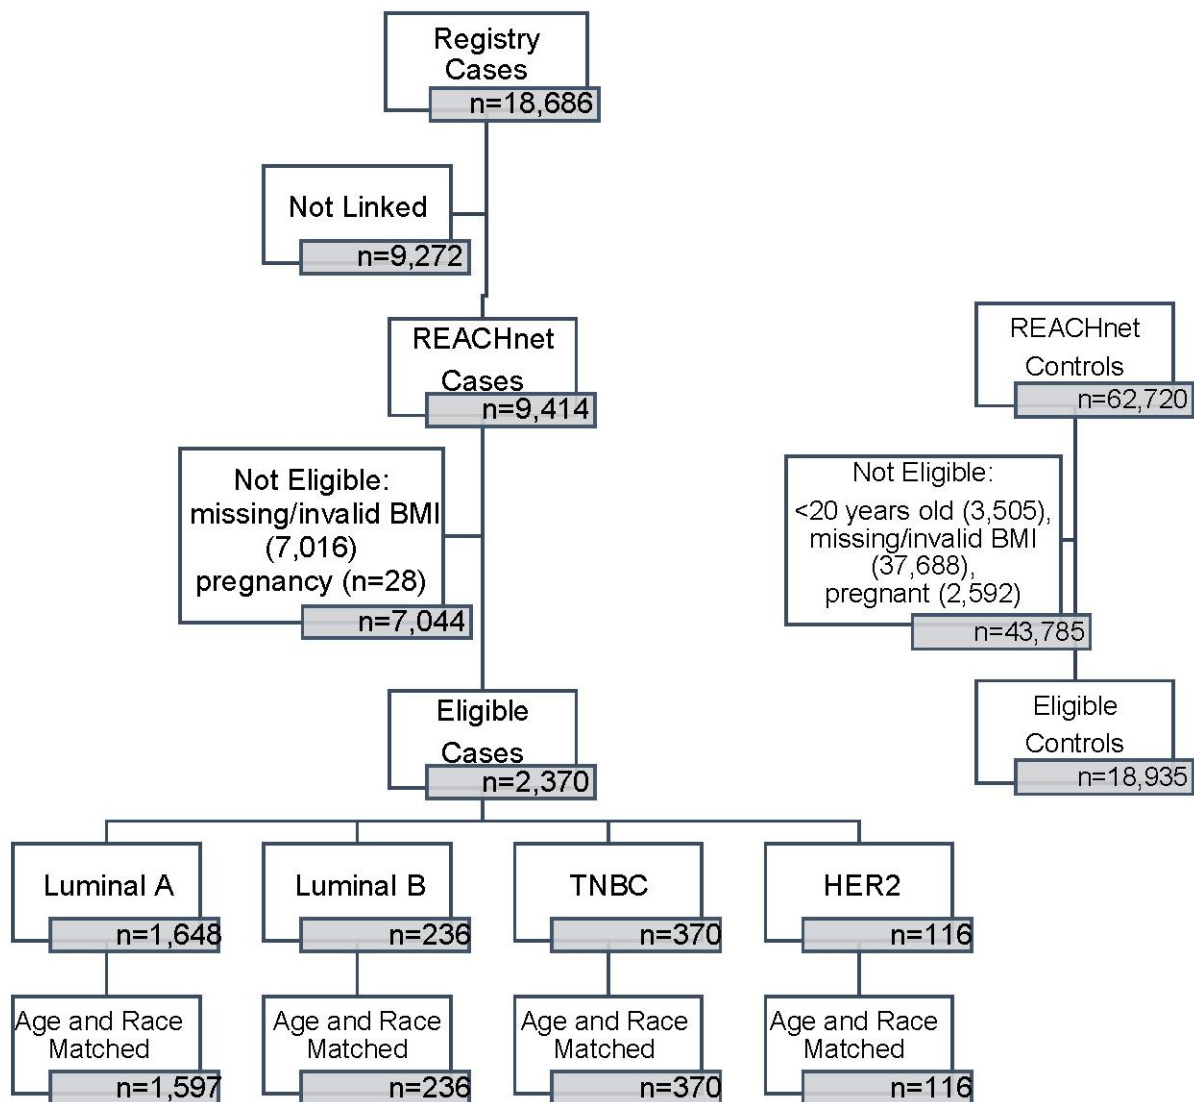

**Appendix**  
**Association of Obesity and Diabetes With the Incidence of Breast Cancer in Louisiana**  
**Hossain et al.**

**Appendix Table 1.** ICD Codes Used to Identify Diabetes and Pregnancy

| <b>Variable</b> | <b>ICD 9</b> | <b>ICD 10</b> | <b>Description</b>           |
|-----------------|--------------|---------------|------------------------------|
| Diabetes        | 250.XX       | E10, E11, E13 | Diabetes                     |
|                 | 790.2X       | R73.0X        | Abnormal glucose/Prediabetes |
| Pregnancy       | V22, V23     | Z33, Z34      | Pregnancy                    |
|                 | 630-679      | O             | Pregnancy complication       |
